# Supplementary material for: Diurnal Oscillations of Soybean Circadian Clock and Drought Responsive Genes
Source: PubMed Central journal article supplement (PMC3903518; doi:10.1371/journal.pone.0086402), 2014-01-27

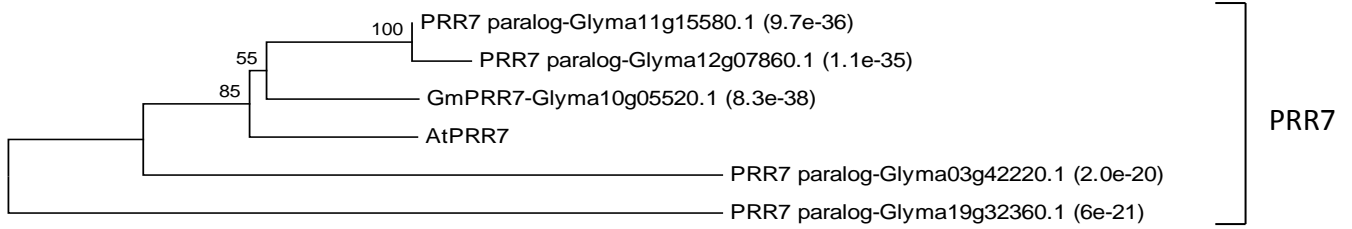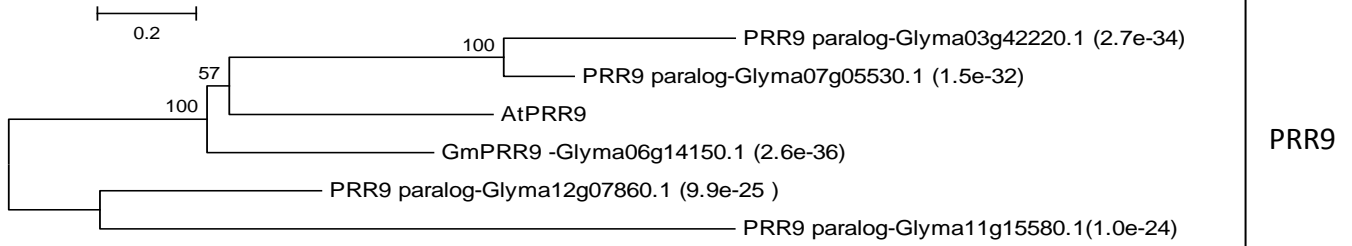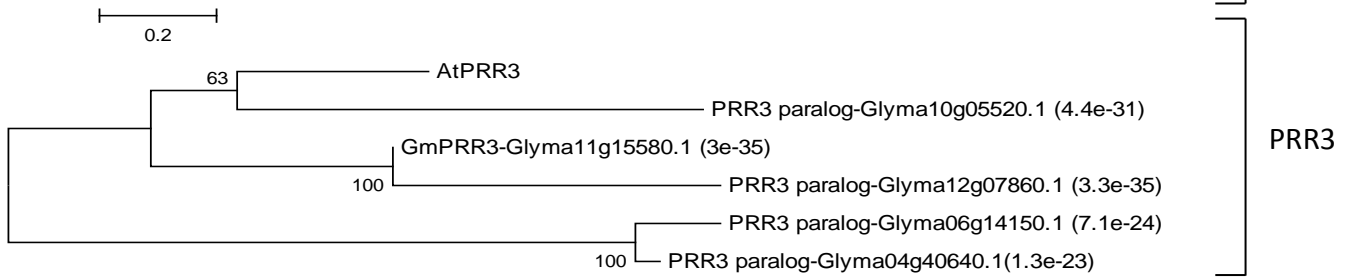

Supplement: pone.0086402.s001.pdf [file pone.0086402.s001.pdf]
